# Supplementary material for: Identification of vanadium dopant sites in the metal–organic framework DUT-5(Al)
Source: Royal Society of Chemistry journal article supplement (doi:10.1039/d1cp00695a), 2021-01-01
Supplement: d1cp00695a1.pdf [file d1cp00695a1.pdf]

## Identification of vanadium dopant sites in the Metal-Organic Framework DUT-5(Al): Supporting information.

Kwinten Maes<sup>a</sup>, Lisa I. D. J. Martin<sup>a</sup>, Samira Khelifi<sup>a</sup>, Alexander Hoffman<sup>b</sup>, Karen Leus<sup>c</sup>, Pascal Van Der Voort<sup>c</sup>, Etienne Goovaerts<sup>d</sup>, Philippe F. Smet<sup>a</sup>, Veronique Van Speybroeck<sup>b</sup>, Freddy Callens<sup>a</sup> and Henk Vrielinck<sup>a</sup>

<sup>a</sup>Department of Solid State Sciences, Ghent University, Krijgslaan 281-S1, B-9000 Gent, Belgium. E-mail: henk.vrielinck@ugent.be

<sup>b</sup>Center for Molecular Modeling, Ghent University, Technologiepark 903, 9052 Zwijnaarde, Belgium.

<sup>c</sup>Department of Chemistry, Ghent University, Krijgslaan 281-S3, B-9000 Gent, Belgium

<sup>d</sup>Department of Physics, University of Antwerp, Universiteitsplein 1, B-2610 Antwerp, Belgium

### Table of Contents

|                                                                         |    |
|-------------------------------------------------------------------------|----|
| 1. EPR spectra and simulations of additional samples .....              | 2  |
| 2. Decomposition of DUT-5(Al):V EPR spectra .....                       | 3  |
| 3. ENDOR .....                                                          | 5  |
| 4. SEM-EDX .....                                                        | 6  |
| 5. FTIR: results, discussion and comparison with DFT calculations ..... | 8  |
| 6. Annealing experiments: FTIR and EPR results.....                     | 12 |
| 7. XRD .....                                                            | 14 |

## 1. EPR spectra and simulations of additional samples

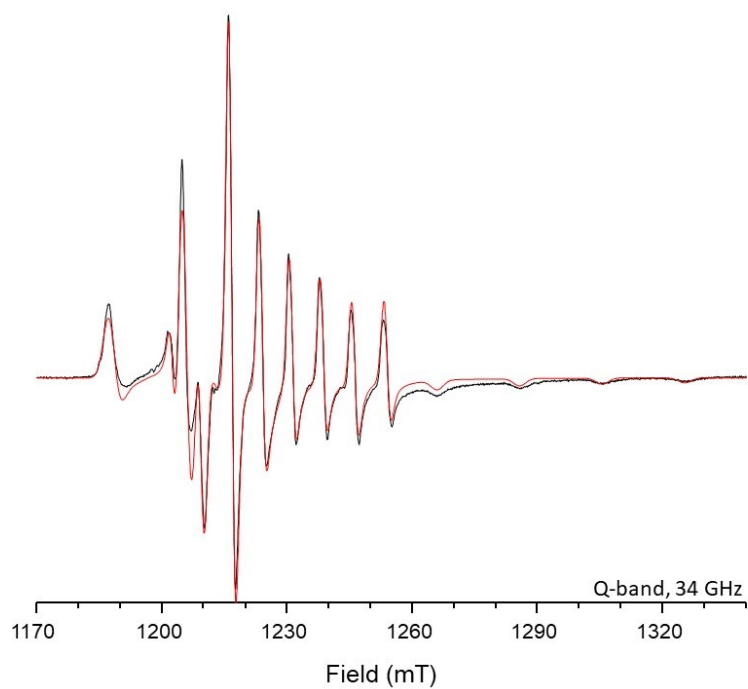

Figure S1: Q-band (34 GHz) 90 K EPR spectrum of the frozen solution of S-DMF-02: black – experiment; red – simulation. Spin-Hamiltonian parameters:  $g = [1.9774, 1.9770, 1.9334]$ ,  $A = [202.4, 196.2, 532.6]$  MHz. An anisotropic Gaussian linewidth was used for the simulations ( $HStrain = [46, 56, 92]$  MHz).

## 2. Decomposition of DUT-5(Al):V EPR spectra

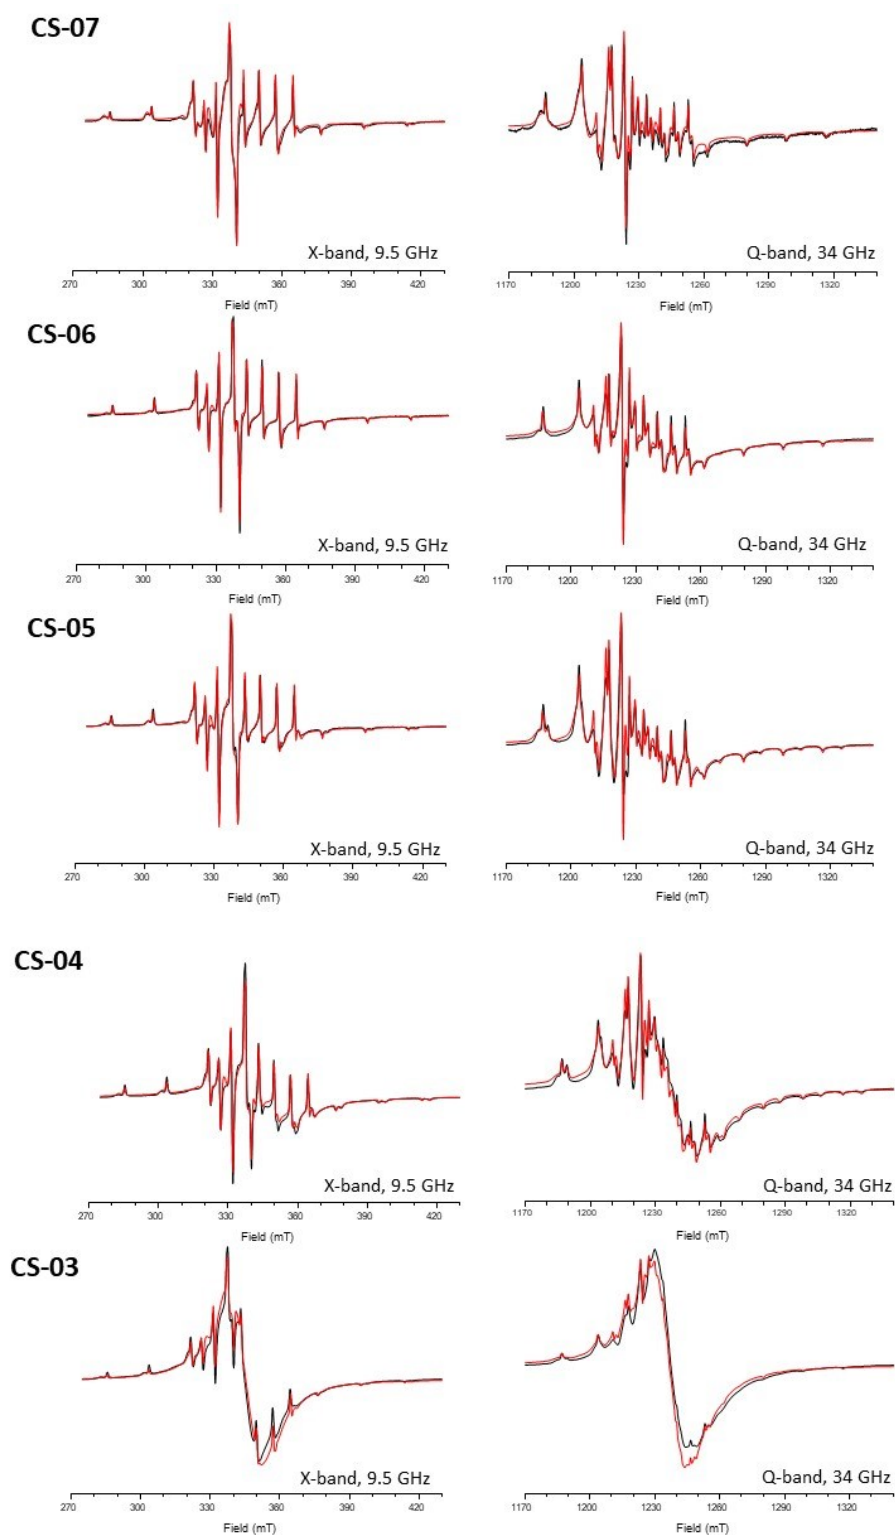

Figure S2: X- (left, 9.5 GHz) and Q-band (right, 34 GHz) RT powder EPR spectra of the CS samples measured in vacuum ( $\approx 30$  Pa): black – experiment; red – simulation. The simulation is a linear combination of the simulated spectra of the four components  $lp$ ,  $BL/Blp$ ,  $np$  and Lorentz, using the multiplication factors presented in Table S1.

| Sample | %V | X-band vacuum |        |     |         | Q-band vacuum |        |      |         |
|--------|----|---------------|--------|-----|---------|---------------|--------|------|---------|
|        |    | lp            | BL/Blp | np  | Lorentz | lp            | BL/Blp | np   | Lorentz |
| CS-07  | 3  | 162           | 215    | 3   | -       | 496           | 589    | 36   | -       |
| CS-06  | 7  | 210           | 79     | 9   | 341     | 2448          | 895    | 219  | 6236    |
| CS-05  | 9  | 189           | 149    | 32  | 255     | 2339          | 2191   | 929  | 5468    |
| CS-04  | 23 | 286           | 250    | 101 | 1102    | 2349          | 2148   | 1456 | 17395   |
| CS-03  | 46 | 189           | 146    | 34  | 1722    | 2383          | 2482   | 549  | 49581   |

Table S1: Simulated multiplication factors of each component as a function of the vanadium concentration (compared to the combined V and Al concentration, as measured by ICP-MS [1]) of the CS samples for the X-band (left) and Q-band (right) 30 Pa measurements. Each simulated component was multiplied with their multiplication factor to reconstruct the total measured EPR spectrum, as presented in Figure S3. Calculated relative error, based on repeated measurements, was 15% for all components.

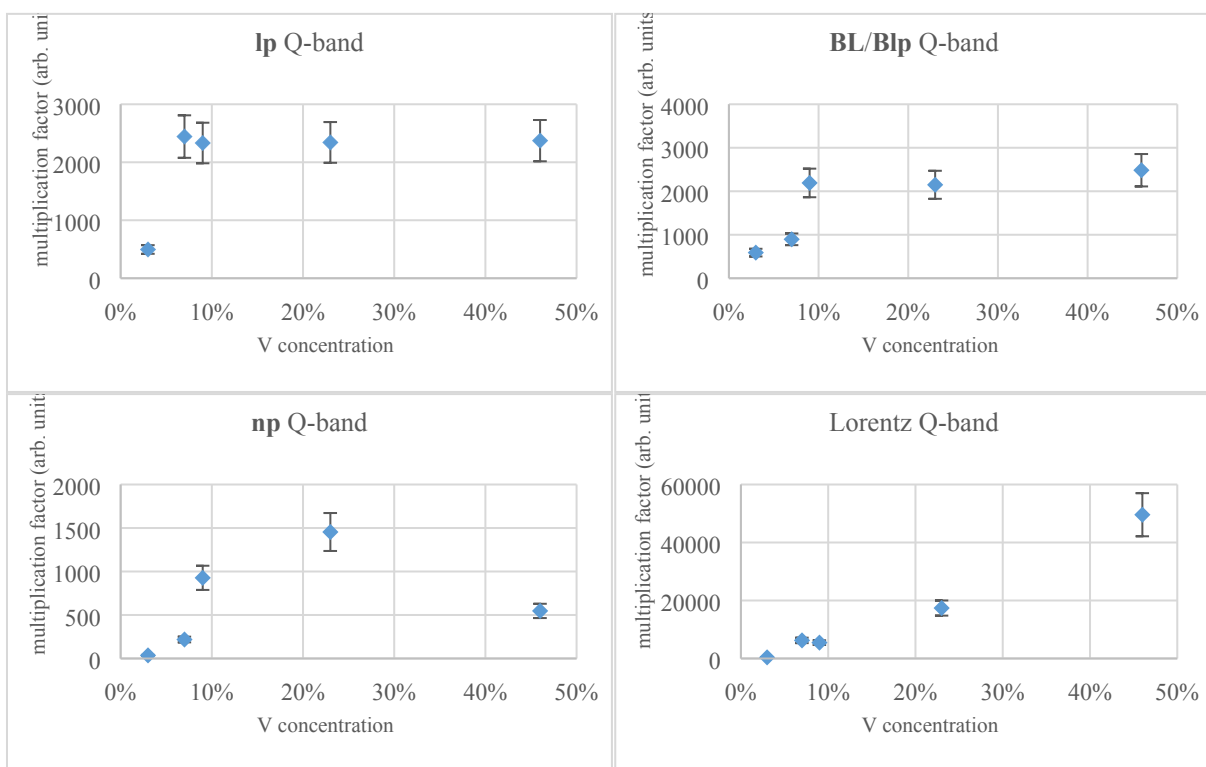

Figure S3: Simulated contribution of each component as a function of the vanadium concentration (compared to the combined V and Al concentration, as measured by ICP-MS [1]) of the CS samples for the Q-band 30 Pa measurements. Each simulated component was multiplied with these multiplication factors to reconstruct the total measured Q-band EPR spectrum. Calculated relative error, based on repeated measurements, was 15% for all components.

### 3. ENDOR

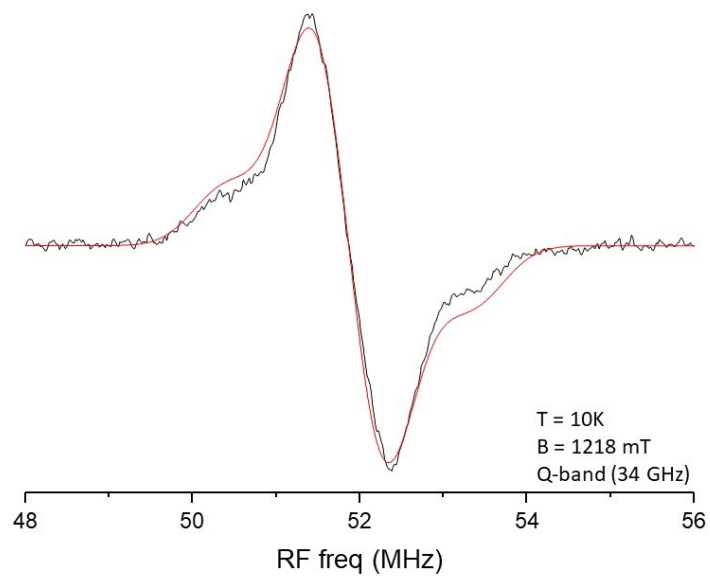

Figure S4: Q-band (34 GHz) 10K powder  $^1\text{H}$  ENDOR spectrum of  $\text{T-VOSO}_4$ . black - experiment, red – simulation. A-tensor and linewidth parameter used for the simulation:  $A = [0, 0, 3.0]$  MHz,  $Lw = 0.9$  MHz. Using the point-dipole approximation, this corresponds to a calculated V-H distance of  $4.3 \text{ \AA}$ .

#### 4. SEM-EDX

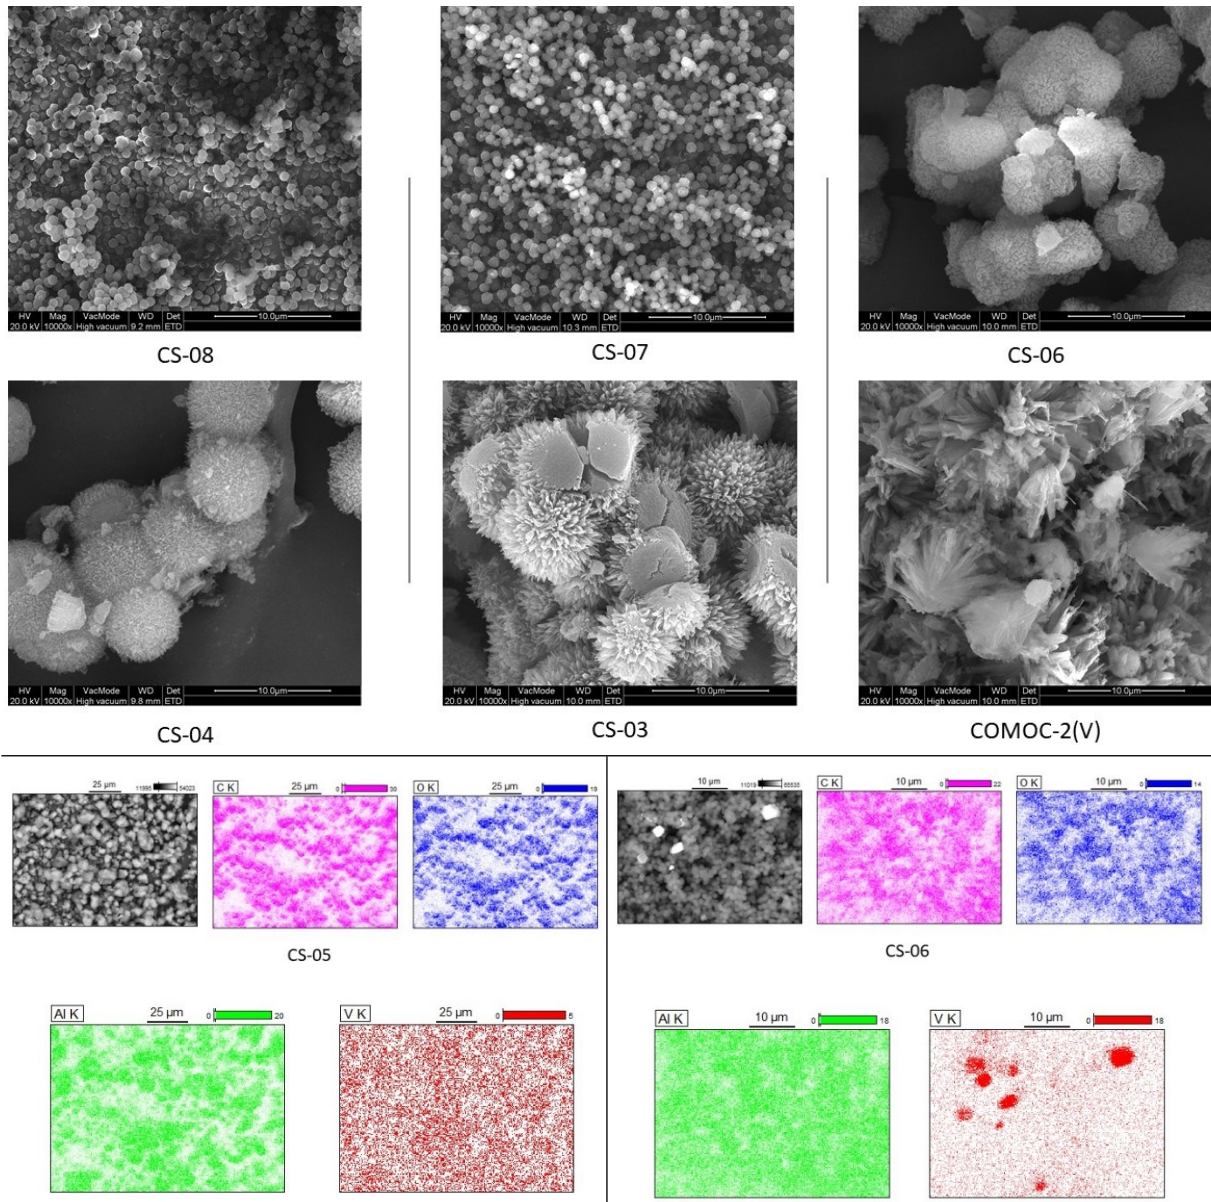

**Figure S5: Top:** SEM images of CS samples and COMOC-2(V). The same magnification (scale indication = 10 μm) is applied for all images, showing an increase in grain size with increasing V concentration. CS-06 and CS-05 are similar in grain size. **Bottom left:** SEM-EDX mapping of CS-05. The images from left to right: SEM image (upper left), carbon mapping (upper middle), oxygen mapping (upper right), aluminum mapping (lower left), vanadium mapping (lower right). Mapping concentrations are calculated based on the intensities of the peaks of the measured EDX spectrum. The scale indication is 25 μm. **Bottom right:** SEM-EDX mapping of CS-06. The images from left to right: SEM image (upper left), carbon mapping (upper middle), oxygen mapping (upper right), aluminum mapping (lower left), vanadium mapping (lower right). Mapping concentrations are calculated based on the intensities of the peaks of the measured EDX spectrum. The scale indication is 10 μm.

| Sample | V concentration EDX (%) | V concentration ICP-MS (%) |
|--------|-------------------------|----------------------------|
| CS-07  | 3.51 ± 0.26             | 3                          |
| CS-06  | 4.39* ± 0.48            | 7                          |
| CS-05  | 9.28 ± 0.39             | 9                          |
| CS-04  | 22.88 ± 12.12           | 23                         |
| CS-03  | 44.57 ± 6.44            | 46                         |

*Table S2: Average vanadium concentration of the CS samples compared to the total vanadium and aluminum present as measured by ICP-MS [1] and EDX. The CS-06 EDX V concentration (indicated by \*) is the average inside the MOF, excluding the clusters with higher V concentration (see Figure S5, bottom right, and main article). The error, calculated from repeated measurements at random points, gives an indication of the homogeneity of V concentration in the MOF.*

## 5. FTIR

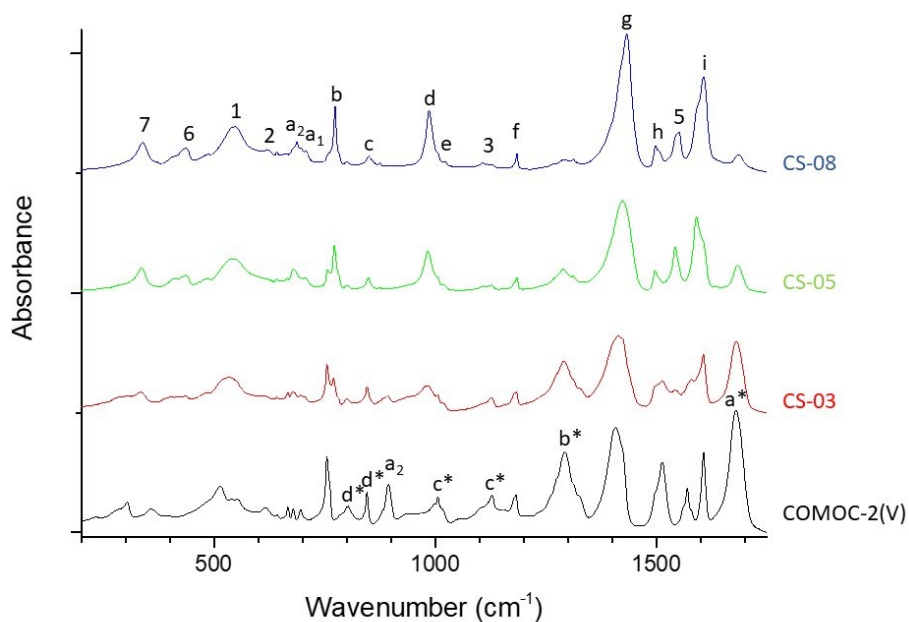

Figure S6: Attenuated total reflection FTIR spectra of COMOC-2(V) (black), CS-03 (red), CS-05 (green) and CS-08 (blue), in the 200-1750  $\text{cm}^{-1}$  range. A full determination of the framework IR peaks was made based on first principles calculations (see Figure S9 and Table S3) and literature data (Hoffman et al. [2] on the isorecticular MIL-53(Al), Senkovska et al. [3] for DUT-5(Al), Depauw et al. [4] for COMOC-2(V) and Sienkiewicz-Gromiuk and Rzączyńska [5] for  $\text{H}_2\text{BPDC}$ ).

**Free linker molecule:** In all IR spectra bands are visible of free linker molecules presumably present inside the framework pores. These IR bands are most prominent in the samples with higher V concentration. Around 1700  $\text{cm}^{-1}$  ( $\text{a}^*$ ) a COOH stretch band is visible and CH bend bands are present around 1300  $\text{cm}^{-1}$  ( $\text{b}^*$ ), 1150  $\text{cm}^{-1}$  and 1000  $\text{cm}^{-1}$  ( $\text{c}^*$ ). The IR bands between 900 and 800  $\text{cm}^{-1}$  ( $\text{d}^*$ ) are originating from C-C-C bending of the benzene unit.

**CS and COMOC-2(V) samples:** In general OH and Al related IR bands are decreasing in relative intensity with increasing V concentration. The two bands around 1600  $\text{cm}^{-1}$  (i) and 1550  $\text{cm}^{-1}$  (5) originate from the antisymmetric  $\text{CO}_2$  stretch combined with C-C stretch of the benzene unit. Around 1500  $\text{cm}^{-1}$ , a combined C-C stretch and CH bend band is present (h). At higher V concentration, this band almost coincides with a new antisymmetric  $\text{CO}_2$  stretch band. The band around 1400  $\text{cm}^{-1}$  (g) originates from the symmetric  $\text{CO}_2$  stretch and shifts to lower wavenumbers with higher V concentration. Another combined C-C stretch and CH bend band is present around 1200  $\text{cm}^{-1}$  (f). There is a free OH bend band around 1000  $\text{cm}^{-1}$  (d) that disappears with higher V concentration, revealing the underlying bands of the free linker molecules. The V=O antisymmetric stretch band is present around 900  $\text{cm}^{-1}$  ( $\text{a}_2$  COMOC-2(V)), as expected growing with increasing V concentration. Around 750  $\text{cm}^{-1}$  (b) there is CH wagging band present that shifts towards lower wavenumbers with increasing V concentration. The symmetric and antisymmetric O-Al-O stretch bands present around 700  $\text{cm}^{-1}$  ( $\text{a}_1$  and  $\text{a}_2$  DUT-5(Al)) disappear with increasing V concentration, revealing three small underlying bands: the band at highest wavenumber originates from CH wagging and the lower frequency modes are due to bending of the  $\text{CO}_2$  unit and to C-C-C bending in the benzene units.



The far-IR region of DUT-5(Al) and COMOC-2(V) is characterized by the same three types of vibrational modes, which were also observed in MIL-53(Al). Around  $500\text{ cm}^{-1}$  (1) there are the metal-oxide stretch bands. Some of the bands are coupled with out-of-plane vibrations of the benzene units. Around  $400\text{ cm}^{-1}$  (6) there are bands of the metal-oxide bending modes and around  $300\text{ cm}^{-1}$  (7) the vibration modes are dominated by translations of the metals along the metal-oxide chain, which also induces translation of the linker.

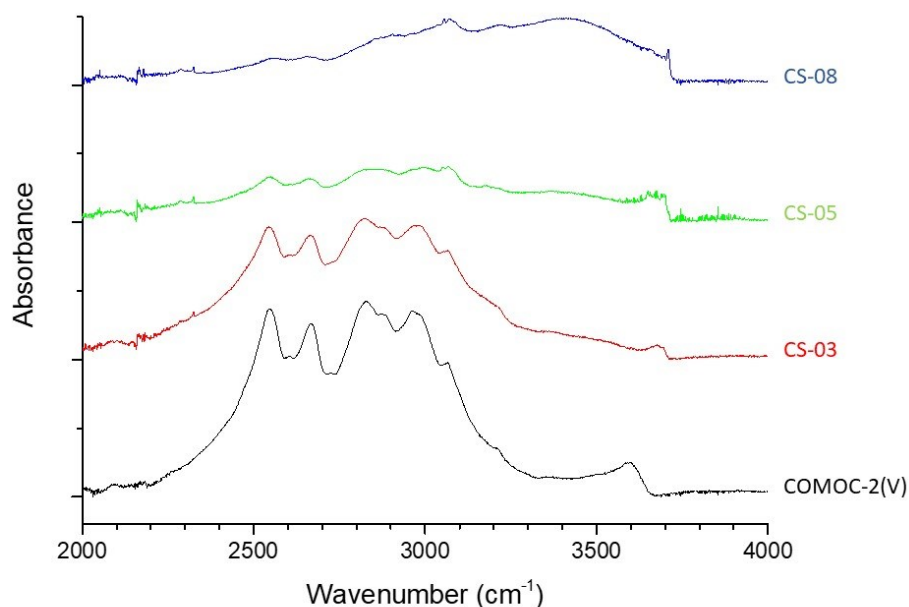

Figure S7: Attenuated total reflection FTIR spectra of COMOC-2(V) (black), CS-03 (red), CS-05 (green) and CS-08 (blue), in the  $2000\text{-}4000\text{ cm}^{-1}$  range.

Between  $2400$  and  $3200\text{ cm}^{-1}$  multiple IR bands are visible originating from free linker molecules trapped inside the framework pores. These bands are most pronounced in the samples with higher V concentration. Around  $3700\text{ cm}^{-1}$  in DUT-5(Al) there is a sharp IR band visible that is originating in from the OH stretch vibration of the hydroxyl groups in the Al-OH-Al chains. With increasing V concentration this sharp IR band disappears and a broader band appears around  $3600\text{ cm}^{-1}$  possibly related to free water inside the framework pores.

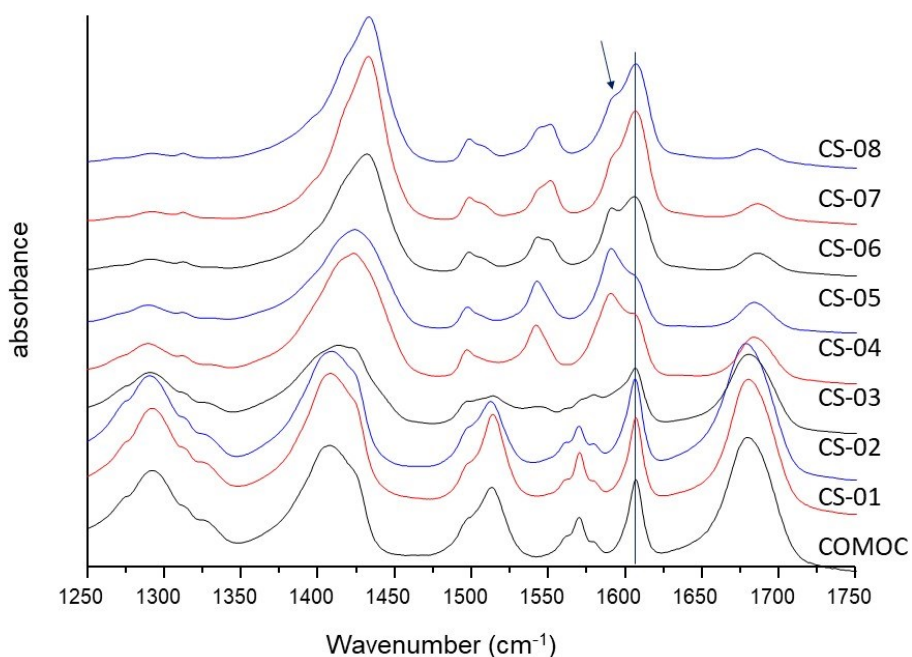

Figure S8: Attenuated total reflection FTIR spectra of the CS samples and COMOC-2(V), in the 1250-1750  $\text{cm}^{-1}$  range. The line shows the antisymmetric  $\text{CO}_2$  stretch peak for the **lp** phase. The arrow points towards the antisymmetric  $\text{CO}_2$  stretch peak for the **np** phase, which is red-shifted compared to the **lp** phase peak.

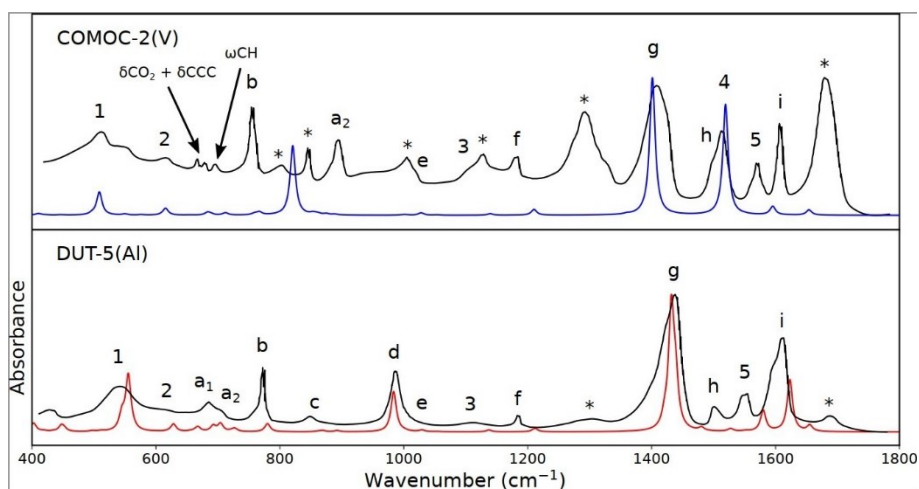

Figure S9: Mid-IR spectra of COMOC-2(V) (top) and DUT-5(Al) (bottom) in the range 400-1800  $\text{cm}^{-1}$ . Experimental IR spectra are represented in black. Static DFT results of the **lp** phases are colored and scaled in frequency with a scaling factor of 1.03 [2]. The labels with letters are the same as those presented in Hoffman et al. [2] for MIL-53(Al), while the labels with numbers characterize additional IR bands. Their assignment can be found in Table S3. IR active modes due to residual BPDC linker are labeled with \*.

| Vibrational mode | Assignment                                     | DUT-5(AI) |      |      | COMOC-2(V) |      |      |
|------------------|------------------------------------------------|-----------|------|------|------------|------|------|
|                  |                                                | np        | lp   | exp  | np         | lp   | exp  |
| 1                | $\nu_{\text{O}_c}\text{MO}_c$                  | 552       | 555  | 550  | 506        | 509  | 520  |
| 2                | $\nu_{\text{O}_c}\text{MO}_c$                  | 616       | 628  | 625  | 604        | 616  | 620  |
| a1               | $\nu_{\text{sym}}\text{MOM}$                   | 661       | 667  | 645  |            |      |      |
| a2               | $\nu_{\text{as}}\text{MOM}$                    | 693       | 705  | 680  | 803        | 821  | 895  |
| b                | $\omega_{\text{CH}}$                           | 779       | 781  | 775  | 764        | 766  | 755  |
| c                | $\delta_{\text{CCC}} + \delta_{\text{CO}_2}$   | 862       | 865  | 850  | 874        | 876  | 850  |
| d                | $\delta_{\text{OH}}$                           | 992       | 984  | 985  |            |      |      |
| e                | $\delta_{\text{CCC}} + \delta_{\text{CH}}$     | 1030      | 1029 | 1005 | 1029       | 1028 | 1005 |
| 3                | $\delta_{\text{CH}}$                           | 1144      | 1137 | 1130 | 1142       | 1139 | 1130 |
| f                | $\nu_{\text{CC}} + \delta_{\text{CH}}$         | 1215      | 1211 | 1180 | 1213       | 1210 | 1180 |
| g                | $\nu_{\text{sym}}\text{CO}_2$                  | 1424      | 1432 | 1425 | 1395       | 1402 | 1405 |
| h                | $\nu_{\text{CC}} + \delta_{\text{CH}}$         | 1526      | 1527 | 1500 | 1521       | 1524 | 1500 |
| 4                | $\nu_{\text{as}}\text{CO}_2$                   |           |      |      | 1507       | 1519 | 1510 |
| 5                | $\nu_{\text{as}}\text{CO}_2 + \nu_{\text{CC}}$ | 1570      | 1580 | 1550 | 1594       | 1595 | 1570 |
| i                | $\nu_{\text{as}}\text{CO}_2 + \nu_{\text{CC}}$ | 1611      | 1623 | 1605 | 1620       | 1624 | 1605 |

Table S3: Assignment of IR active modes of DUT-5(AI) and COMOC-2(V) in the mid-IR region, based on the simulations presented in Figure S9 and the experimental spectra in Figure S6. Simulated data are scaled with a scaling factor of 1.03 [2]. Frequencies are given in  $\text{cm}^{-1}$ .

## 6. Annealing experiments

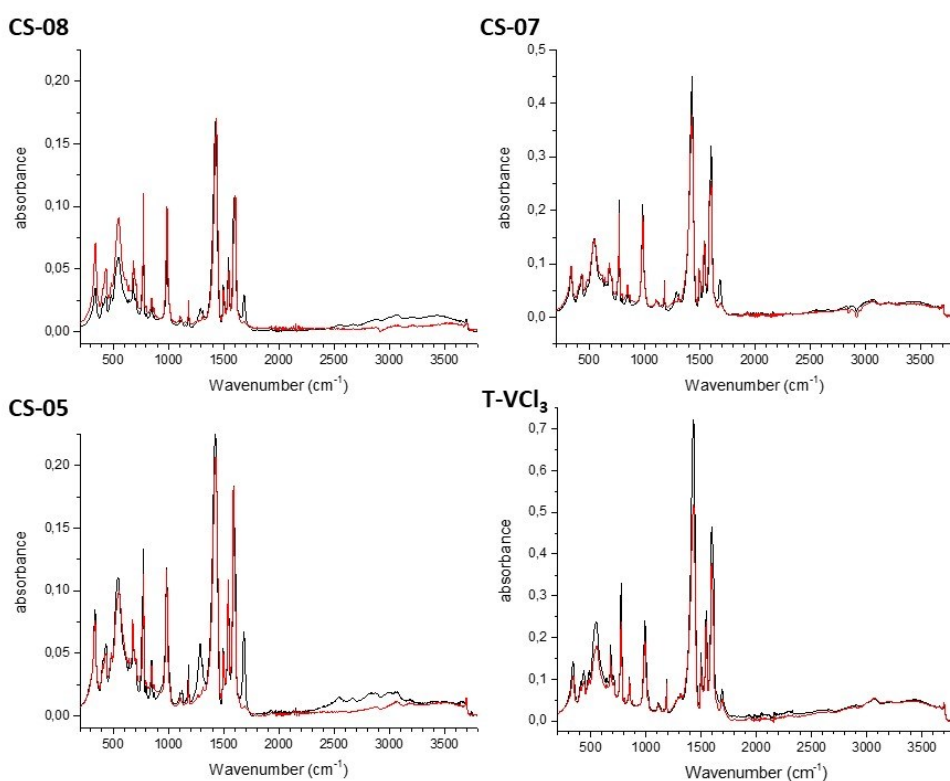

Figure S10: Attenuated total reflection FTIR spectra of CS-08 (left up), CS-07 (right up), CS-05 (left down) and T-VCl<sub>3</sub> (right down): black – before calcination; red – after calcination.

| X-band vacuum          |     |        |    |         |      |
|------------------------|-----|--------|----|---------|------|
| Sample                 | lp  | BL/Blp | np | Lorentz | Giso |
| CS-08                  | 78  | 85     | 1  | -       | -    |
| CS-08-H                | 96  | 70     | 9  | -       | 6    |
| CS-07                  | 162 | 215    | 3  | -       | -    |
| CS-07-H*               | 255 | 748    | 44 | -       | 14   |
| CS-05                  | 189 | 149    | 32 | 255     | -    |
| CS-05-H                | 136 | 128    | 42 | 237     | 6    |
| T-VCl <sub>3</sub>     | 24  | 250    | 16 | -       | -    |
| T-VCl <sub>3</sub> -H* | 58  | 419    | 53 | -       | 7    |

Table S4: Simulated multiplication factors of each component as a function of the vanadium concentration (compared to the combined V and Al concentration, as measured by ICP-MS [1]) of CS-08, CS-07, CS-05 and T-VCl<sub>3</sub> before and after calcination for the X-band 30 Pa measurements. Component Giso refers to the isotropic line with  $g = 2.004$  present in the EPR spectra after calcination. Each simulated component was multiplied with the tabulated multiplication factor to reconstruct the total measured EPR spectrum, as presented in Figure S11. For the two calcined samples CS-07-H and T-VCl<sub>3</sub>-H the sample quantity differed strongly from the non-calcined CS-07 and T-VCl<sub>3</sub> samples, therefore only the comparison of the ratios of the multiplication factors is relevant. Calculated relative error, based on repeated measurements, was 15% for all components.

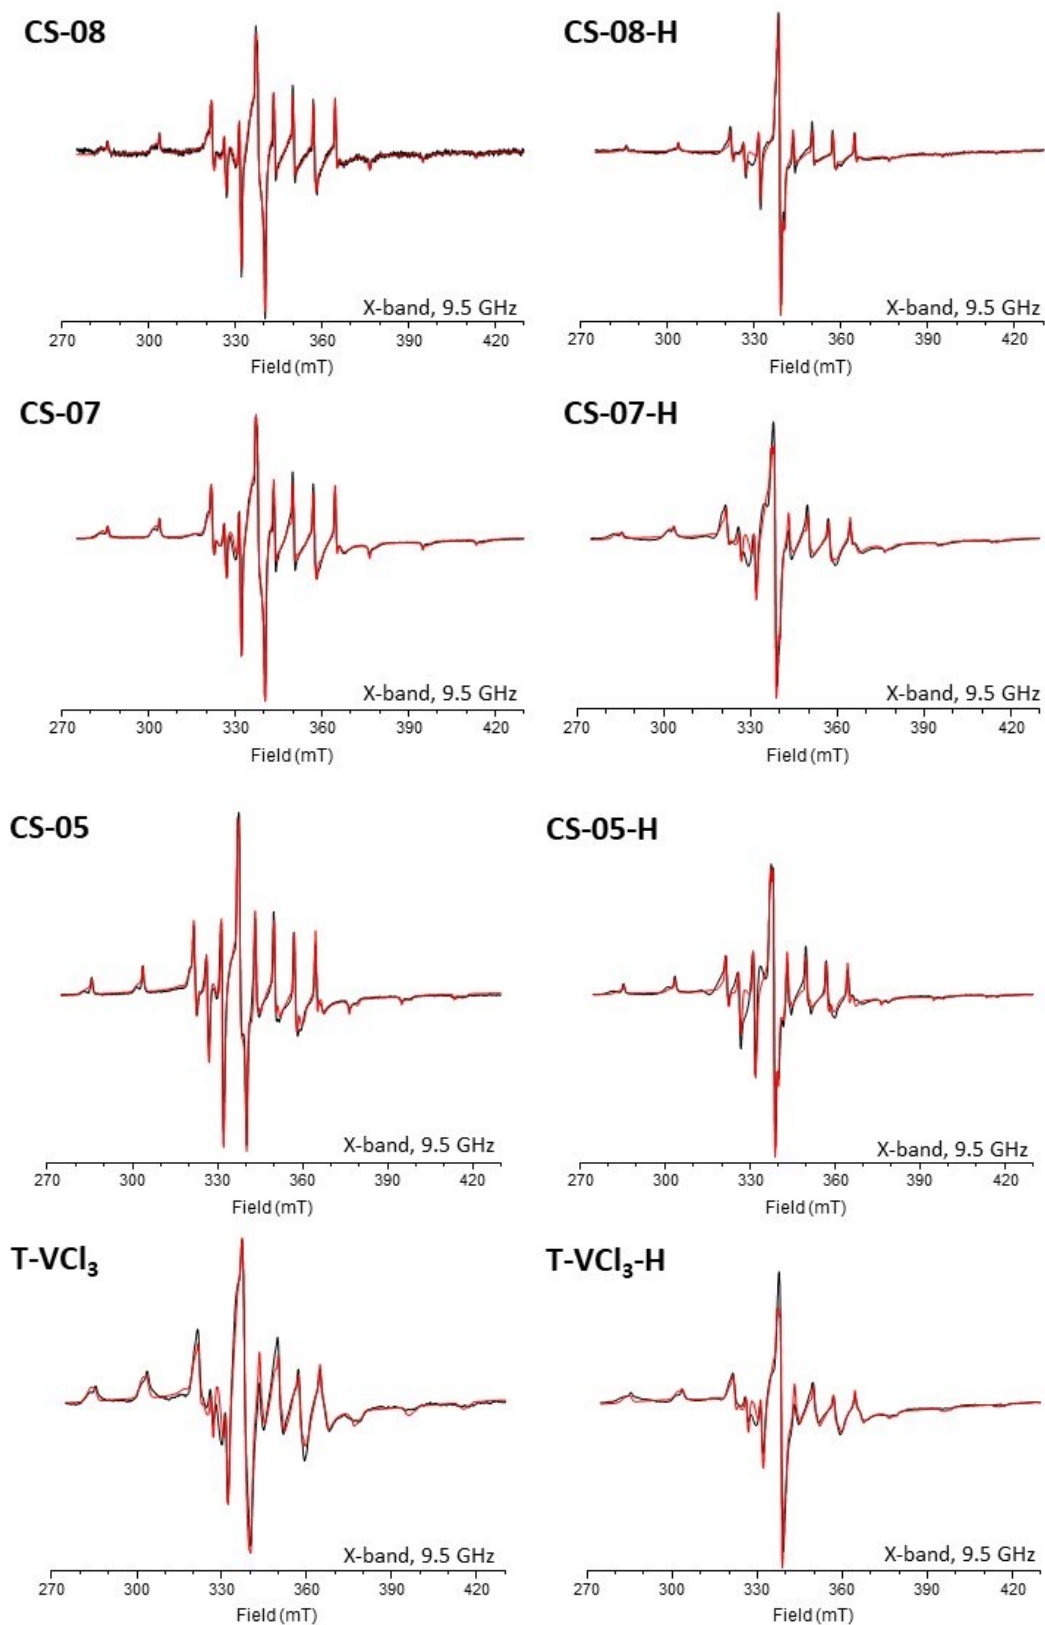

Figure S11: X- band (9.5 GHz) RT powder EPR spectra of the CS-08, CS-07, CS-05 and T-VCl<sub>3</sub> samples before (left) and after (right) calcination measured in vacuum ( $\approx 30$  Pa): black – experiment; red – simulation. The simulation is a linear combination of the simulated spectra of the four components  $1p$ ,  $BL/Blp$ ,  $np$  and Lorentz, using the multiplication factors presented in Table S4.

## 7. XRD

|          | DUT-5(Al) |        | COMOC-2(V) |        | CS-08 - CS-04 |
|----------|-----------|--------|------------|--------|---------------|
|          | EXP       | MM     | EXP        | MM     | EXP           |
| LP (110) | 6.02°     | 6.31°  | 6.04°      | 5.94°  | 6.05°         |
| NP (002) | 6.38°     | 6.35°  | 6.37°      | 6.28°  | 6.35°         |
| LP (220) | 12.05°    | 12.64° | 12.10°     | 11.88° | 12.05°        |
| NP (004) | 12.78°    | 12.72° | 12.78°     | 12.59° | 12.80°        |

Table S5: XRD diffraction angle calculated from crystallographic data, both the experimental (EXP) and molecular modeling (MM) data, for DUT-5(Al) [6] and COMOC-2(V) [7]. XRD diffraction angles for the CS samples were estimated from Figure S12. Error margin 0.05°.

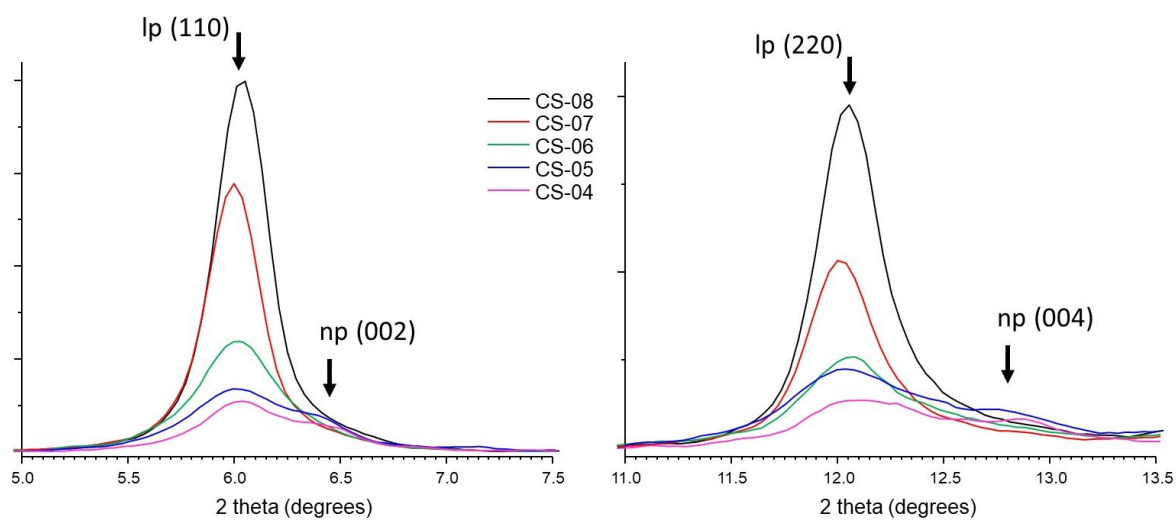

Figure S12: V concentration dependence of XRD patterns of DUT-5(Al) in air in two different  $2\theta$  regions,  $\lambda = 1.54056 \text{ \AA}$ . Miller indices for the peaks related to **lp** and **np** are indicated. Reproduced from Maes et al. [8].

1. Depauw, H., et al., *Discovery of a novel, large pore phase in a bimetallic Al/V metal-organic framework*. *Journal of Materials Chemistry A*, 2017. **5**(47): p. 24580-24584.
2. Hoffman, A.E.J., et al., *Elucidating the Vibrational Fingerprint of the Flexible Metal-Organic Framework MIL-53(Al) Using a Combined Experimental/Computational Approach*. *J. Phys. Chem. C*, 2018. **122**(5): p. 2734-2746.
3. Senkowska, I., et al., *New highly porous aluminium based metal-organic frameworks: Al(OH)(ndc) (ndc = 2,6-naphthalene dicarboxylate) and Al(OH)(bpdc) (bpdc = 4,4'-biphenyl dicarboxylate)*. *Microporous and Mesoporous Materials*, 2009. **122**(1-3): p. 93-98.
4. Depauw, H., *Investigation of the Doping Effect in Bimetallic Metal-organic Frameworks to Tune Their Structural Flexibility*, in *Faculty of Sciences*. 2018, Ghent University: Ghent, Belgium.
5. Sienkiewicz-Gromiuk, J. and Z. Rzączyńska, *Structural, thermal, and spectral investigations of the lanthanide(III) biphenyl-4,4'-dicarboxylates*. *Journal of Thermal Analysis and Calorimetry*, 2012. **112**(2): p. 877-884.
6. Wieme, J., *Advanced Molecular Simulations to Computationally Model Phase Stability and Thermal Properties of Metal-Organic Frameworks*, in *Faculty of Engineering and Architecture*. 2020, Ghent University. p. 330.
7. Liu, Y.Y., et al., *New V(IV)-based metal-organic framework having framework flexibility and high CO<sub>2</sub> adsorption capacity*. *Inorg. Chem.*, 2013. **52**(1): p. 113-20.
8. Maes, K., et al., *EPR characterization of vanadium dopant sites in DUT-5(Al)*. *Optical Materials*, 2019. **94**: p. 217-223.
